# Supplementary material for: Fast Responsive, Reversible Colorimetric Nanoparticle-Hydrogel Complexes for pH Monitoring
Source: MDPI journal article supplement (doi:10.3390/nano12224081), 2022-11-20
Supplement: s1 [file s1]

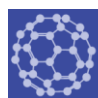

## Supplementary Information

# Fast Responsive, Reversible Colorimetric Nanoparticle-Hydrogel Complexes for pH Monitoring

Yeonjin Kim <sup>1,†</sup>, Taeha Lee <sup>1,2,†</sup>, Minsu Kim <sup>1</sup>, Soojin Park <sup>1</sup>, Jiashu Hu <sup>1</sup>, Kyungwon Lee <sup>1</sup>, Yoochan Hong <sup>3,\*</sup>, Insu Park <sup>4,\*</sup> and Gyudo Lee <sup>1,2,\*</sup>

<sup>1</sup> Department of Biotechnology and Bioinformatics, Korea University, Sejong 30019, Republic of Korea

<sup>2</sup> Interdisciplinary Graduate Program for Artificial Intelligence Smart Convergence Technology, Korea University, Sejong 30019, Republic of Korea

<sup>3</sup> Department of Medical Device, Korea Institute of Machinery and Materials (KIMM), Daegu 42994, Republic of Korea

<sup>4</sup> Department of Biomedical Engineering, Konyang University, Daejeon 35365, Republic of Korea

\* Correspondence: ychong1983@kimm.re.kr (Y.H.); insupark@konyang.ac.kr (I.P.); lk0807@korea.ac.kr (G.L.)

† These authors contributed equally to this work.

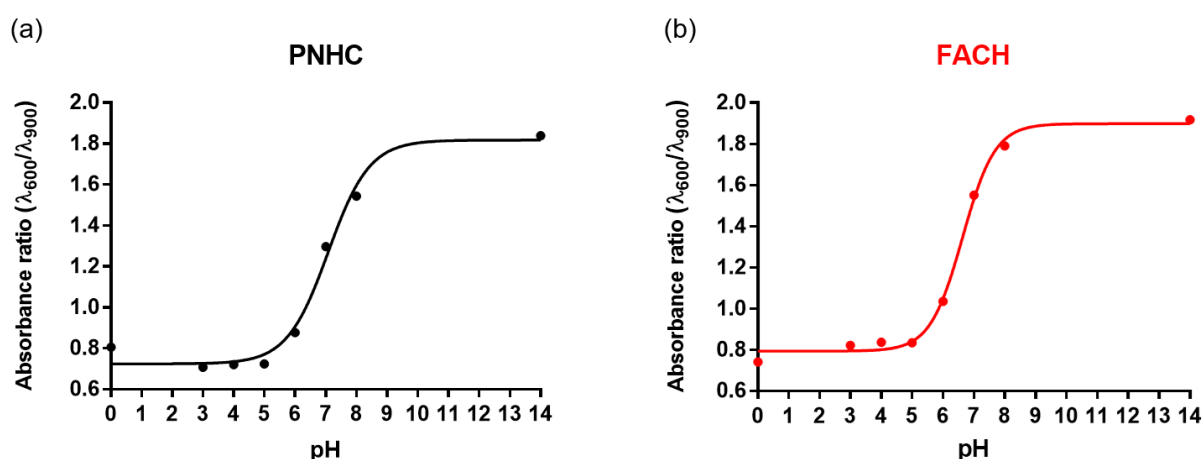

**Figure S1.** Absorbance ratio ( $\lambda_{600}/\lambda_{900}$ ) including pH 0 and 14 conditions of (a) PNHC and (b) FACH. Hydrogels were treated with various pH solutions for a sufficient time (1 h) for chemical reactions.

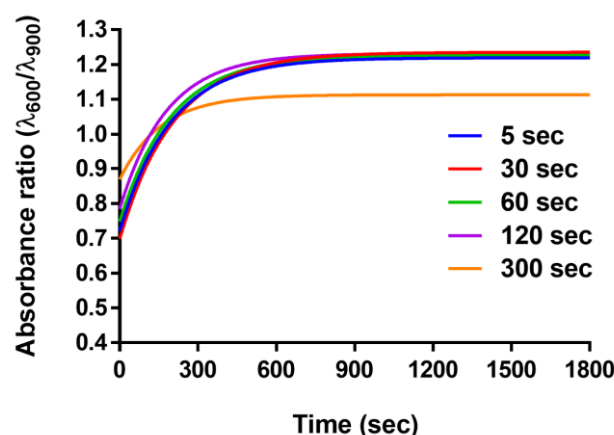

**Figure S2.** Measurement of FACH reaction rate according to ferrocene treatment time (5, 30, 60, 120, and 300 s). To the pH 3 hydrogels treated with ferrocene for different times, 2 mL of PBS (pH 8) was added, and the absorbance ratio ( $\lambda_{600}/\lambda_{900}$ ) was observed for 30 min.
